# Supplementary material for: Unveiling epimerization effects: a rotational study of α-d-galactose
Source: Royal Society of Chemistry journal article supplement (doi:10.1039/c5cc01783a), 2015-01-01
Supplement: c5cc01783a1.pdf [file c5cc01783a1.pdf]

## Supplementary Information

for

# Unveiling epimerization effects: a rotational study of $\alpha$ -D-Galactose

Isabel Peña, Carlos Cabezas and José L. Alonso

### Contents

**Tables S1-S4:** Transition frequencies of rotamers I, II, III and IV of  $\alpha$ -D-galactose.

**Table S5-S8.** Cartesian coordinates for the four low-energy conformers of  $\alpha$ -D-galactose. The geometries have been optimized *ab initio* at the MP2/6-311++G(d,p) level of theory.

**Complete Reference 17.**

**Table S1.** Observed frequencies and residuals (in MHz) for the rotational transitions of rotamer I.

| $J'$ | $K'_{-1}$ | $K'_{+1}$ | $J''$ | $K''_{-1}$ | $K''_{+1}$ | $\nu_{\text{obs}}$ | $\nu_{\text{obs}} - \nu_{\text{cal}}$ |
|------|-----------|-----------|-------|------------|------------|--------------------|---------------------------------------|
| 3    | 2         | 1         | 2     | 1          | 1          | 6176.327           | 0.019                                 |
| 5    | 1         | 5         | 4     | 1          | 4          | 6302.492           | 0.006                                 |
| 5    | 0         | 5         | 4     | 0          | 4          | 6376.205           | 0.001                                 |
| 5    | 2         | 4         | 4     | 2          | 3          | 6864.455           | 0.001                                 |
| 5    | 4         | 2         | 4     | 4          | 1          | 7065.326           | 0.012                                 |
| 5    | 3         | 3         | 4     | 3          | 2          | 7065.886           | 0.000                                 |
| 5    | 4         | 1         | 4     | 4          | 0          | 7071.149           | 0.007                                 |
| 5    | 3         | 2         | 4     | 3          | 1          | 7186.243           | 0.004                                 |
| 5    | 1         | 4         | 4     | 1          | 3          | 7217.960           | 0.015                                 |
| 4    | 1         | 3         | 3     | 0          | 3          | 7375.884           | 0.001                                 |
| 5    | 2         | 3         | 4     | 2          | 2          | 7447.325           | 0.018                                 |
| 6    | 1         | 6         | 5     | 1          | 5          | 7506.947           | 0.004                                 |
| 6    | 0         | 6         | 5     | 0          | 5          | 7543.780           | 0.006                                 |
| 4    | 2         | 2         | 3     | 1          | 2          | 7617.722           | 0.006                                 |
| 3    | 3         | 0         | 2     | 2          | 0          | 7655.724           | 0.002                                 |
| 3    | 3         | 1         | 2     | 2          | 1          | 7694.704           | -0.006                                |
| 6    | 2         | 5         | 5     | 2          | 4          | 8160.173           | 0.008                                 |
| 6    | 1         | 5         | 5     | 1          | 4          | 8471.109           | 0.005                                 |
| 6    | 3         | 4         | 5     | 3          | 3          | 8471.556           | 0.015                                 |
| 6    | 4         | 3         | 5     | 4          | 2          | 8504.542           | 0.004                                 |
| 6    | 4         | 2         | 5     | 4          | 1          | 8529.735           | 0.006                                 |
| 13   | 4         | 9         | 12    | 6          | 6          | 8604.908           | -0.019                                |
| 7    | 1         | 7         | 6     | 1          | 6          | 8701.955           | -0.003                                |
| 7    | 0         | 7         | 6     | 0          | 6          | 8718.643           | -0.002                                |
| 6    | 3         | 3         | 5     | 3          | 2          | 8749.703           | 0.025                                 |
| 4    | 3         | 1         | 3     | 2          | 1          | 8991.735           | -0.024                                |
| 4    | 3         | 2         | 3     | 2          | 2          | 9162.457           | 0.008                                 |
| 5    | 2         | 3         | 4     | 1          | 3          | 9190.621           | 0.009                                 |
| 7    | 2         | 6         | 6     | 2          | 5          | 9423.617           | 0.002                                 |
| 7    | 1         | 6         | 6     | 1          | 5          | 9649.579           | 0.008                                 |
| 7    | 3         | 5         | 6     | 3          | 4          | 9852.677           | -0.018                                |
| 7    | 6         | 1         | 6     | 6          | 0          | 9880.848           | 0.014                                 |
| 8    | 1         | 8         | 7     | 1          | 7          | 9891.890           | 0.000                                 |
| 8    | 0         | 8         | 7     | 0          | 7          | 9898.996           | -0.001                                |
| 7    | 5         | 3         | 6     | 5          | 2          | 9914.129           | 0.012                                 |
| 7    | 4         | 4         | 6     | 4          | 3          | 9948.152           | -0.004                                |
| 7    | 4         | 3         | 6     | 4          | 2          | 10026.431          | 0.014                                 |
| 5    | 3         | 2         | 4     | 2          | 2          | 10279.108          | -0.012                                |
| 7    | 3         | 4         | 6     | 3          | 3          | 10351.216          | 0.005                                 |
| 7    | 2         | 5         | 6     | 2          | 4          | 10377.462          | 0.006                                 |
| 4    | 4         | 0         | 3     | 3          | 0          | 10462.052          | -0.020                                |
| 4    | 4         | 1         | 3     | 3          | 1          | 10467.702          | -0.021                                |
| 8    | 2         | 7         | 7     | 2          | 6          | 10659.110          | -0.005                                |
| 8    | 1         | 7         | 7     | 1          | 6          | 10796.873          | -0.017                                |
| 6    | 2         | 4         | 5     | 1          | 4          | 10921.714          | -0.006                                |
| 9    | 1         | 9         | 8     | 1          | 8          | 11079.368          | -0.005                                |
| 9    | 0         | 9         | 8     | 0          | 8          | 11082.257          | -0.020                                |
| 8    | 4         | 4         | 7     | 4          | 3          | 11578.311          | -0.017                                |

**Table S2.** Observed frequencies and residuals (in MHz) for the rotational transitions of rotamer II.

| $J'$ | $K'_{-1}$ | $K'_{+1}$ | $J''$ | $K''_{-1}$ | $K''_{+1}$ | $\nu_{\text{obs}}$ | $\nu_{\text{obs}} - \nu_{\text{cal}}$ |
|------|-----------|-----------|-------|------------|------------|--------------------|---------------------------------------|
| 3    | 2         | 1         | 2     | 1          | 1          | 6035.765           | 0.007                                 |
| 5    | 1         | 5         | 4     | 0          | 4          | 6058.713           | 0.009                                 |
| 5    | 2         | 4         | 4     | 2          | 3          | 6450.413           | -0.007                                |
| 3    | 2         | 2         | 2     | 1          | 2          | 6451.008           | 0.003                                 |
| 5    | 4         | 2         | 4     | 4          | 1          | 6636.544           | 0.002                                 |
| 5    | 3         | 3         | 4     | 3          | 2          | 6639.705           | 0.005                                 |
| 3    | 2         | 1         | 2     | 1          | 2          | 6650.668           | 0.003                                 |
| 5    | 3         | 2         | 4     | 3          | 1          | 6745.223           | 0.003                                 |
| 5    | 1         | 4         | 4     | 1          | 3          | 6813.982           | 0.016                                 |
| 4    | 2         | 3         | 3     | 1          | 2          | 6833.882           | 0.004                                 |
| 6    | 0         | 6         | 5     | 1          | 5          | 6982.540           | 0.007                                 |
| 5    | 2         | 3         | 4     | 2          | 2          | 7010.880           | 0.005                                 |
| 6    | 1         | 6         | 5     | 1          | 5          | 7019.134           | 0.003                                 |
| 6    | 0         | 6         | 5     | 0          | 5          | 7062.924           | 0.002                                 |
| 4    | 1         | 3         | 3     | 0          | 3          | 7066.632           | -0.005                                |
| 6    | 1         | 5         | 5     | 2          | 4          | 7072.074           | -0.002                                |
| 6    | 1         | 6         | 5     | 0          | 5          | 7099.533           | 0.014                                 |
| 4    | 2         | 2         | 3     | 1          | 2          | 7377.083           | 0.016                                 |
| 3    | 3         | 1         | 2     | 2          | 0          | 7603.874           | 0.000                                 |
| 3    | 3         | 0         | 2     | 2          | 0          | 7609.383           | -0.017                                |
| 3    | 3         | 0         | 2     | 2          | 1          | 7651.434           | 0.003                                 |
| 6    | 2         | 5         | 5     | 2          | 4          | 7668.385           | 0.013                                 |
| 5    | 2         | 4         | 4     | 1          | 3          | 7741.828           | 0.016                                 |
| 6    | 3         | 4         | 5     | 3          | 3          | 7963.381           | -0.020                                |
| 6    | 1         | 5         | 5     | 1          | 4          | 7999.938           | 0.015                                 |
| 4    | 2         | 3         | 3     | 1          | 3          | 8058.169           | 0.003                                 |
| 7    | 0         | 7         | 6     | 1          | 6          | 8117.698           | 0.005                                 |
| 7    | 1         | 7         | 6     | 1          | 6          | 8133.554           | 0.008                                 |
| 7    | 0         | 7         | 6     | 0          | 6          | 8154.305           | 0.014                                 |
| 7    | 1         | 7         | 6     | 0          | 6          | 8170.154           | 0.010                                 |
| 6    | 3         | 3         | 5     | 3          | 2          | 8211.842           | 0.001                                 |
| 6    | 2         | 4         | 5     | 2          | 3          | 8437.152           | 0.008                                 |
| 7    | 1         | 6         | 6     | 2          | 5          | 8512.190           | 0.009                                 |
| 6    | 2         | 5         | 5     | 1          | 4          | 8596.221           | 0.002                                 |
| 4    | 2         | 2         | 3     | 1          | 3          | 8601.358           | 0.004                                 |
| 4    | 3         | 2         | 3     | 2          | 1          | 8824.991           | -0.000                                |
| 7    | 2         | 6         | 6     | 2          | 5          | 8855.211           | 0.017                                 |
| 4    | 3         | 1         | 3     | 2          | 1          | 8862.721           | 0.019                                 |
| 4    | 3         | 2         | 3     | 2          | 2          | 9024.641           | -0.010                                |
| 4    | 3         | 1         | 3     | 2          | 2          | 9062.367           | 0.005                                 |
| 7    | 1         | 6         | 6     | 1          | 5          | 9108.478           | 0.002                                 |
| 8    | 0         | 8         | 7     | 1          | 7          | 9235.681           | 0.006                                 |
| 8    | 1         | 8         | 7     | 1          | 7          | 9242.314           | 0.009                                 |
| 8    | 0         | 8         | 7     | 0          | 7          | 9251.535           | 0.007                                 |
| 8    | 1         | 8         | 7     | 0          | 7          | 9258.170           | 0.012                                 |
| 7    | 3         | 5         | 6     | 3          | 4          | 9265.612           | 0.004                                 |
| 7    | 4         | 4         | 6     | 4          | 3          | 9346.570           | -0.001                                |
| 7    | 4         | 3         | 6     | 4          | 2          | 9410.828           | -0.002                                |
| 7    | 2         | 6         | 6     | 1          | 5          | 9451.490           | 0.001                                 |
| 7    | 3         | 4         | 6     | 3          | 3          | 9722.343           | -0.000                                |
| 7    | 2         | 5         | 6     | 2          | 4          | 9797.468           | 0.015                                 |
| 8    | 1         | 7         | 7     | 2          | 6          | 9834.330           | 0.002                                 |
| 5    | 3         | 3         | 4     | 2          | 2          | 9919.420           | 0.008                                 |
| 8    | 2         | 7         | 7     | 2          | 6          | 10014.131          | -0.010                                |
| 8    | 1         | 7         | 7     | 1          | 6          | 10177.339          | -0.001                                |

|    |   |    |   |   |   |           |        |
|----|---|----|---|---|---|-----------|--------|
| 9  | 0 | 9  | 8 | 1 | 8 | 10345.496 | -0.005 |
| 9  | 1 | 9  | 8 | 1 | 8 | 10348.198 | -0.004 |
| 9  | 0 | 9  | 8 | 0 | 8 | 10352.125 | -0.005 |
| 9  | 1 | 9  | 8 | 0 | 8 | 10354.830 | -0.002 |
| 8  | 2 | 7  | 7 | 1 | 6 | 10357.145 | -0.008 |
| 4  | 4 | 1  | 3 | 3 | 0 | 10412.323 | -0.005 |
| 4  | 4 | 0  | 3 | 3 | 0 | 10412.908 | -0.020 |
| 4  | 4 | 1  | 3 | 3 | 1 | 10417.859 | 0.006  |
| 4  | 4 | 0  | 3 | 3 | 1 | 10418.449 | -0.004 |
| 5  | 3 | 3  | 4 | 2 | 3 | 10462.593 | -0.006 |
| 8  | 3 | 6  | 7 | 3 | 5 | 10538.076 | -0.004 |
| 5  | 3 | 2  | 4 | 2 | 3 | 10605.836 | 0.005  |
| 8  | 5 | 4  | 7 | 5 | 3 | 10675.108 | -0.023 |
| 8  | 5 | 3  | 7 | 5 | 2 | 10687.125 | -0.012 |
| 6  | 3 | 4  | 5 | 2 | 3 | 10871.936 | -0.003 |
| 9  | 1 | 8  | 8 | 2 | 7 | 11063.210 | -0.019 |
| 8  | 2 | 6  | 7 | 2 | 5 | 11072.028 | -0.010 |
| 9  | 2 | 8  | 8 | 2 | 7 | 11151.167 | -0.005 |
| 8  | 3 | 5  | 7 | 3 | 4 | 11230.785 | 0.002  |
| 9  | 1 | 8  | 8 | 1 | 7 | 11243.030 | -0.013 |
| 9  | 2 | 8  | 8 | 1 | 7 | 11330.975 | -0.010 |
| 10 | 0 | 10 | 9 | 1 | 9 | 11451.681 | -0.014 |
| 10 | 1 | 10 | 9 | 1 | 9 | 11452.775 | 0.002  |
| 10 | 0 | 10 | 9 | 0 | 9 | 11454.387 | -0.009 |
| 10 | 1 | 10 | 9 | 0 | 9 | 11455.463 | -0.011 |

**Table S3.** Observed frequencies and residuals (in MHz) for the rotational transitions of rotamer III.

| $J'$ | $K'_{-1}$ | $K'_{+1}$ | $J''$ | $K''_{-1}$ | $K''_{+1}$ | $\nu_{\text{obs}}$ | $\nu_{\text{obs}} - \nu_{\text{cal}}$ |
|------|-----------|-----------|-------|------------|------------|--------------------|---------------------------------------|
| 5    | 0         | 5         | 4     | 0          | 4          | 6062.700           | 0.008                                 |
| 5    | 2         | 4         | 4     | 2          | 3          | 6488.118           | 0.003                                 |
| 5    | 3         | 3         | 4     | 3          | 2          | 6652.008           | -0.017                                |
| 3    | 2         | 1         | 2     | 1          | 2          | 6702.502           | 0.001                                 |
| 5    | 3         | 2         | 4     | 3          | 1          | 6734.178           | -0.005                                |
| 5    | 1         | 4         | 4     | 1          | 3          | 6846.504           | 0.017                                 |
| 4    | 2         | 3         | 3     | 1          | 2          | 6977.148           | 0.016                                 |
| 5    | 2         | 3         | 4     | 2          | 2          | 6989.291           | 0.004                                 |
| 6    | 0         | 6         | 5     | 1          | 5          | 7062.198           | 0.020                                 |
| 6    | 1         | 6         | 5     | 1          | 5          | 7111.892           | 0.009                                 |
| 6    | 0         | 6         | 5     | 0          | 5          | 7165.056           | 0.004                                 |
| 6    | 1         | 6         | 5     | 0          | 5          | 7214.767           | 0.010                                 |
| 6    | 2         | 5         | 5     | 2          | 4          | 7723.825           | 0.009                                 |
| 3    | 3         | 1         | 2     | 2          | 0          | 7763.692           | -0.003                                |
| 3    | 3         | 0         | 2     | 2          | 1          | 7803.578           | 0.000                                 |
| 5    | 2         | 4         | 4     | 1          | 3          | 7912.382           | 0.004                                 |
| 6    | 3         | 4         | 5     | 3          | 3          | 7982.277           | -0.008                                |
| 6    | 1         | 5         | 5     | 1          | 4          | 8066.362           | 0.004                                 |
| 6    | 3         | 3         | 5     | 3          | 2          | 8180.424           | 0.007                                 |
| 7    | 0         | 7         | 6     | 1          | 6          | 8222.796           | -0.010                                |
| 7    | 1         | 7         | 6     | 1          | 6          | 8245.638           | 0.000                                 |
| 7    | 0         | 7         | 6     | 0          | 6          | 8272.513           | 0.002                                 |
| 7    | 1         | 7         | 6     | 0          | 6          | 8295.323           | -0.019                                |
| 6    | 2         | 4         | 5     | 2          | 3          | 8425.067           | 0.014                                 |
| 7    | 2         | 6         | 6     | 2          | 5          | 8931.676           | 0.010                                 |
| 4    | 3         | 2         | 3     | 2          | 1          | 9002.330           | 0.002                                 |
| 4    | 3         | 1         | 3     | 2          | 2          | 9202.158           | 0.003                                 |
| 7    | 1         | 6         | 6     | 1          | 5          | 9211.681           | -0.006                                |
| 7    | 3         | 5         | 6     | 3          | 4          | 9296.001           | -0.003                                |
| 7    | 4         | 4         | 6     | 4          | 3          | 9354.843           | 0.006                                 |
| 8    | 1         | 8         | 7     | 1          | 7          | 9373.200           | 0.004                                 |
| 8    | 0         | 8         | 7     | 0          | 7          | 9385.901           | -0.006                                |
| 7    | 2         | 6         | 6     | 1          | 5          | 9655.004           | -0.009                                |
| 7    | 3         | 4         | 6     | 3          | 3          | 9673.134           | -0.001                                |
| 7    | 2         | 5         | 6     | 2          | 4          | 9807.821           | 0.016                                 |
| 8    | 2         | 7         | 7     | 2          | 6          | 10113.461          | -0.004                                |
| 8    | 1         | 7         | 7     | 1          | 6          | 10308.649          | -0.000                                |
| 6    | 2         | 4         | 5     | 1          | 4          | 10463.454          | -0.005                                |
| 9    | 1         | 9         | 8     | 1          | 8          | 10497.379          | -0.008                                |
| 9    | 1         | 9         | 8     | 0          | 8          | 10507.512          | 0.005                                 |
| 8    | 3         | 6         | 7     | 3          | 5          | 10585.512          | 0.004                                 |
| 4    | 4         | 1         | 3     | 3          | 0          | 10630.857          | 0.012                                 |
| 4    | 4         | 0         | 3     | 3          | 1          | 10635.479          | -0.002                                |
| 5    | 3         | 2         | 4     | 2          | 3          | 10710.617          | 0.003                                 |
| 8    | 4         | 5         | 7     | 4          | 4          | 10712.852          | -0.015                                |
| 8    | 4         | 4         | 7     | 4          | 3          | 10827.879          | -0.007                                |
| 3    | 3         | 1         | 2     | 0          | 2          | 10905.826          | -0.015                                |
| 8    | 3         | 5         | 7     | 3          | 4          | 11179.762          | -0.013                                |
| 9    | 1         | 8         | 8     | 1          | 7          | 11392.325          | -0.014                                |

**Table S4.** Observed frequencies and residuals (in MHz) for the rotational transitions of rotamer IV.

| $J'$ | $K'_{-1}$ | $K'_{+1}$ | $J''$ | $K''_{-1}$ | $K''_{+1}$ | $\nu_{\text{obs}}$ | $\nu_{\text{obs}} - \nu_{\text{cal}}$ |
|------|-----------|-----------|-------|------------|------------|--------------------|---------------------------------------|
| 3    | 2         | 1         | 2     | 1          | 1          | 6147.977           | -0.010                                |
| 5    | 1         | 5         | 4     | 1          | 4          | 6212.162           | 0.012                                 |
| 5    | 0         | 5         | 4     | 0          | 4          | 6291.710           | 0.012                                 |
| 3    | 2         | 2         | 2     | 1          | 2          | 6552.510           | 0.010                                 |
| 5    | 2         | 4         | 4     | 2          | 3          | 6757.152           | -0.011                                |
| 5    | 3         | 2         | 4     | 3          | 1          | 7051.349           | 0.015                                 |
| 5    | 1         | 4         | 4     | 1          | 3          | 7110.668           | -0.010                                |
| 4    | 1         | 3         | 3     | 0          | 3          | 7265.406           | 0.007                                 |
| 5    | 2         | 3         | 4     | 2          | 2          | 7310.418           | 0.004                                 |
| 6    | 1         | 6         | 5     | 1          | 5          | 7400.922           | 0.014                                 |
| 6    | 0         | 6         | 5     | 0          | 5          | 7442.160           | 0.027                                 |
| 4    | 2         | 2         | 3     | 1          | 2          | 7553.333           | 0.006                                 |
| 3    | 3         | 0         | 2     | 2          | 0          | 7666.104           | 0.006                                 |
| 3    | 3         | 1         | 2     | 2          | 1          | 7702.353           | 0.004                                 |
| 6    | 2         | 5         | 5     | 2          | 4          | 8036.935           | -0.000                                |
| 4    | 2         | 3         | 3     | 1          | 3          | 8214.963           | 0.003                                 |
| 6    | 1         | 5         | 5     | 1          | 4          | 8356.828           | 0.005                                 |
| 6    | 3         | 3         | 5     | 3          | 2          | 8578.538           | -0.017                                |
| 7    | 1         | 7         | 6     | 1          | 6          | 8579.995           | 0.002                                 |
| 7    | 0         | 7         | 6     | 0          | 6          | 8599.334           | 0.006                                 |
| 6    | 2         | 4         | 5     | 2          | 3          | 8793.544           | 0.001                                 |
| 4    | 3         | 1         | 3     | 2          | 1          | 8981.498           | 0.001                                 |
| 5    | 2         | 3         | 4     | 1          | 3          | 9084.004           | 0.009                                 |
| 12   | 3         | 10        | 11    | 4          | 8          | 9665.398           | -0.020                                |
| 7    | 3         | 5         | 6     | 3          | 4          | 9691.622           | 0.011                                 |
| 8    | 1         | 8         | 7     | 1          | 7          | 9753.696           | 0.024                                 |
| 5    | 2         | 4         | 4     | 1          | 4          | 9963.812           | -0.012                                |
| 5    | 3         | 2         | 4     | 2          | 2          | 10245.617          | -0.010                                |
| 4    | 4         | 1         | 3     | 3          | 0          | 10479.217          | -0.007                                |
| 4    | 4         | 0         | 3     | 3          | 0          | 10479.831          | -0.008                                |
| 4    | 4         | 1         | 3     | 3          | 1          | 10484.822          | 0.011                                 |
| 5    | 3         | 3         | 4     | 2          | 3          | 10639.872          | -0.013                                |
| 6    | 2         | 4         | 5     | 1          | 4          | 10766.849          | -0.011                                |
| 9    | 1         | 9         | 8     | 1          | 8          | 10924.628          | -0.017                                |
| 8    | 2         | 6         | 7     | 2          | 5          | 11541.948          | -0.011                                |

**Table S5.** Cartesian coordinates of the observed G-g+/cl/t conformer from the optimized *ab initio* structure at the MP2/6-311++G(d,p) level.

| Standard orientation:       |                  |                |                         |           |           |  |
|-----------------------------|------------------|----------------|-------------------------|-----------|-----------|--|
| Center<br>Number            | Atomic<br>Number | Atomic<br>Type | Coordinates (Angstroms) |           |           |  |
|                             |                  |                | X                       | Y         | Z         |  |
| 1                           | 6                | 0              | 1.028709                | 0.861964  | 0.546592  |  |
| 2                           | 6                | 0              | -0.486075               | 0.996719  | 0.575843  |  |
| 3                           | 6                | 0              | -1.108595               | -0.398847 | 0.647792  |  |
| 4                           | 8                | 0              | -0.673810               | -1.230441 | -0.431601 |  |
| 5                           | 6                | 0              | 0.717321                | -1.416018 | -0.475994 |  |
| 6                           | 6                | 0              | 1.440060                | -0.074366 | -0.583039 |  |
| 7                           | 6                | 0              | -2.626178               | -0.395965 | 0.562403  |  |
| 8                           | 8                | 0              | 2.834483                | -0.357635 | -0.519242 |  |
| 9                           | 8                | 0              | 1.675758                | 2.120343  | 0.394944  |  |
| 10                          | 1                | 0              | -0.810061               | -0.846779 | 1.605756  |  |
| 11                          | 8                | 0              | -3.078496               | 0.101361  | -0.698802 |  |
| 12                          | 1                | 0              | 1.176399                | 0.382832  | -1.544073 |  |
| 13                          | 1                | 0              | 3.271597                | 0.492490  | -0.384598 |  |
| 14                          | 1                | 0              | 1.378864                | 0.449866  | 1.497798  |  |
| 15                          | 1                | 0              | 1.166488                | 2.591764  | -0.278468 |  |
| 16                          | 8                | 0              | -0.832366               | 1.734610  | -0.590786 |  |
| 17                          | 8                | 0              | 1.120591                | -2.107176 | 0.686114  |  |
| 18                          | 1                | 0              | -1.750220               | 1.513285  | -0.809404 |  |
| 19                          | 1                | 0              | -0.787029               | 1.551933  | 1.477805  |  |
| 20                          | 1                | 0              | -3.040201               | 0.268595  | 1.324982  |  |
| 21                          | 1                | 0              | -3.000855               | -1.411132 | 0.733264  |  |
| 22                          | 1                | 0              | -2.742645               | -0.517446 | -1.358584 |  |
| 23                          | 1                | 0              | 2.078241                | -1.983007 | 0.739258  |  |
| 24                          | 1                | 0              | 0.898687                | -2.021813 | -1.370330 |  |
| Rotational constants (GHZ): |                  |                | 1.4026659               | 0.8030052 | 0.5959414 |  |

**Table S6.** Cartesian coordinates of the observed G+g+/cc/t conformer from the optimized *ab initio* structure at the MP2/6-311++G(d,p) level.

Standard orientation:

| Center<br>Number            | Atomic<br>Number | Atomic<br>Type | Coordinates (Angstroms) |           |           |
|-----------------------------|------------------|----------------|-------------------------|-----------|-----------|
|                             |                  |                | X                       | Y         | Z         |
| 1                           | 6                | 0              | -1.482217               | -0.358918 | 0.508395  |
| 2                           | 6                | 0              | -0.400792               | -1.432438 | 0.490575  |
| 3                           | 8                | 0              | 0.879530                | -0.871466 | 0.620468  |
| 4                           | 6                | 0              | 1.199333                | 0.116451  | -0.376459 |
| 5                           | 6                | 0              | 0.188790                | 1.253654  | -0.400985 |
| 6                           | 6                | 0              | -1.211883               | 0.678735  | -0.571686 |
| 7                           | 6                | 0              | 2.608369                | 0.574069  | -0.047055 |
| 8                           | 8                | 0              | 3.530842                | -0.502389 | -0.146934 |
| 9                           | 8                | 0              | -2.129967               | 1.761162  | -0.465845 |
| 10                          | 8                | 0              | -2.783010               | -0.916281 | 0.367766  |
| 11                          | 1                | 0              | 1.202707                | -0.364656 | -1.363614 |
| 12                          | 8                | 0              | 0.286230                | 1.990332  | 0.806842  |
| 13                          | 1                | 0              | -1.286583               | 0.207021  | -1.561292 |
| 14                          | 1                | 0              | -1.457024               | 0.133403  | 1.483017  |
| 15                          | 1                | 0              | -2.724834               | -1.542291 | -0.365565 |
| 16                          | 1                | 0              | -2.997451               | 1.365759  | -0.314192 |
| 17                          | 1                | 0              | 2.922673                | 1.326200  | -0.775215 |
| 18                          | 1                | 0              | 2.617116                | 1.020972  | 0.952248  |
| 19                          | 1                | 0              | 3.221709                | -1.165916 | 0.478508  |
| 20                          | 8                | 0              | -0.573257               | -2.137643 | -0.726664 |
| 21                          | 1                | 0              | -0.491133               | 2.563460  | 0.820886  |
| 22                          | 1                | 0              | 0.417468                | 1.897325  | -1.264611 |
| 23                          | 1                | 0              | -0.006114               | -2.915774 | -0.699272 |
| 24                          | 1                | 0              | -0.511084               | -2.104540 | 1.347328  |
| Rotational constants (GHZ): |                  |                | 1.4039265               | 0.7585871 | 0.5548754 |



**Table S7.** Cartesian coordinates of the observed Tg+/cc/g+ conformer from the optimized *ab initio* structure at the MP2/6-311++G(d,p) level.

Standard orientation:

| Center<br>Number            | Atomic<br>Number | Atomic<br>Type | Coordinates (Angstroms) |           |           |
|-----------------------------|------------------|----------------|-------------------------|-----------|-----------|
|                             |                  |                | X                       | Y         | Z         |
| 1                           | 6                | 0              | -1.559364               | 0.075191  | 0.492094  |
| 2                           | 6                | 0              | -0.835193               | 0.921570  | -0.542204 |
| 3                           | 6                | 0              | 0.670374                | 0.828893  | -0.344072 |
| 4                           | 6                | 0              | 1.111648                | -0.628034 | -0.291190 |
| 5                           | 8                | 0              | 0.339069                | -1.415937 | 0.627310  |
| 6                           | 6                | 0              | -1.048017               | -1.358589 | 0.436489  |
| 7                           | 8                | 0              | -1.193069               | 2.293886  | -0.410226 |
| 8                           | 8                | 0              | 1.065520                | 1.468512  | 0.864725  |
| 9                           | 6                | 0              | 2.551153                | -0.758578 | 0.208983  |
| 10                          | 8                | 0              | 3.422610                | 0.147393  | -0.450083 |
| 11                          | 8                | 0              | -1.457623               | -1.867400 | -0.822933 |
| 12                          | 8                | 0              | -2.968542               | 0.143596  | 0.311940  |
| 13                          | 1                | 0              | 1.015909                | -1.042814 | -1.303045 |
| 14                          | 1                | 0              | -1.351558               | 0.473989  | 1.487721  |
| 15                          | 1                | 0              | -3.164861               | -0.419462 | -0.448029 |
| 16                          | 1                | 0              | -1.081709               | 0.556377  | -1.548465 |
| 17                          | 1                | 0              | -2.150573               | 2.312197  | -0.288936 |
| 18                          | 1                | 0              | 0.582567                | 2.305468  | 0.881147  |
| 19                          | 1                | 0              | 1.169329                | 1.301910  | -1.200639 |
| 20                          | 1                | 0              | 2.917572                | -1.766795 | 0.004493  |
| 21                          | 1                | 0              | 2.545807                | -0.597964 | 1.291082  |
| 22                          | 1                | 0              | 3.281094                | 1.002888  | -0.030701 |
| 23                          | 1                | 0              | -1.294835               | -2.816735 | -0.821342 |
| 24                          | 1                | 0              | -1.476080               | -1.952180 | 1.250244  |
| Rotational constants (GHZ): |                  |                | 1.4391927               | 0.7593187 | 0.5649239 |

**Table S8.** Cartesian coordinates of the observed G-g-/cc/g+ conformer from the optimized *ab initio* structure at the MP2/6-311++G(d,p) level.

Standard orientation:

| Center<br>Number            | Atomic<br>Number | Atomic<br>Type | Coordinates (Angstroms) |           |           |
|-----------------------------|------------------|----------------|-------------------------|-----------|-----------|
|                             |                  |                | X                       | Y         | Z         |
| 1                           | 6                | 0              | 1.448721                | -0.041532 | -0.579888 |
| 2                           | 6                | 0              | 1.007776                | 0.856593  | 0.565306  |
| 3                           | 6                | 0              | -0.510031               | 0.964182  | 0.581083  |
| 4                           | 6                | 0              | -1.129468               | -0.430118 | 0.609750  |
| 5                           | 8                | 0              | -0.638178               | -1.266099 | -0.442294 |
| 6                           | 6                | 0              | 0.755967                | -1.395102 | -0.478394 |
| 7                           | 8                | 0              | 1.522163                | 2.173842  | 0.400802  |
| 8                           | 8                | 0              | -0.964305               | 1.663164  | -0.573539 |
| 9                           | 6                | 0              | -2.651983               | -0.422264 | 0.511302  |
| 10                          | 8                | 0              | -3.159956               | -0.015409 | -0.740328 |
| 11                          | 8                | 0              | 1.285483                | -2.012389 | 0.686483  |
| 12                          | 8                | 0              | 2.864552                | -0.169743 | -0.610601 |
| 13                          | 1                | 0              | -0.863351               | -0.870586 | 1.582831  |
| 14                          | 1                | 0              | 1.155688                | 0.420856  | -1.525133 |
| 15                          | 1                | 0              | 3.087899                | -0.793934 | 0.092061  |
| 16                          | 1                | 0              | 1.345618                | 0.428759  | 1.519112  |
| 17                          | 1                | 0              | 2.443638                | 2.072008  | 0.131415  |
| 18                          | 1                | 0              | -0.410326               | 2.451817  | -0.641803 |
| 19                          | 1                | 0              | -0.825265               | 1.496783  | 1.490729  |
| 20                          | 1                | 0              | -3.026309               | 0.214798  | 1.328357  |
| 21                          | 1                | 0              | -3.015128               | -1.439788 | 0.678764  |
| 22                          | 1                | 0              | -2.669021               | 0.777089  | -0.989965 |
| 23                          | 1                | 0              | 1.005805                | -2.934108 | 0.679172  |
| 24                          | 1                | 0              | 0.966782                | -2.001182 | -1.364661 |
| Rotational constants (GHZ): |                  |                | 1.4073558               | 0.7875310 | 0.5882185 |

### **Complete Reference 17:**

Gaussian 09 (Revision B.01), Frisch, M. J.; Trucks, G. W.; Schlegel, H. B.; Scuseria, G. E.; Robb, M. A.; Cheeseman, J. R.; Scalmani, G.; Barone, V.; Mennucci, B.; Petersson, G. A.; Nakatsuji, H.; Caricato, M.; Li, X.; Hratchian, H. P.; Izmaylov, A. F.; Bloino, J.; Zheng, G.; Sonnenberg, J. L.; Hada, M.; Ehara, M.; Toyota, K.; Fukuda, R.; Hasegawa, J.; Ishida, M.; Nakajima, T.; Honda, Y.; Kitao, O.; Nakai, H.; Vreven, T.; Montgomery, Jr., J. A.; Peralta, J. E.; Ogliaro, F.; Bearpark, M.; Heyd, J. J.; Brothers, E.; Kudin, K. N.; Staroverov, V. N.; Kobayashi, R.; Normand, J.; Raghavachari, K.; Rendell, A.; Burant, J. C.; Iyengar, S. S.; Tomasi, J.; Cossi, M.; Rega, N.; Millam, J. M.; Klene, M.; Knox, J. E.; Cross, J. B.; Bakken, V.; Adamo, C.; Jaramillo, J.; Gomperts, R.; Stratmann, R. E.; Yazyev, O.; Austin, A. J.; Cammi, R.; Pomelli, C.; Ochterski, J. W.; Martin, R. L.; Morokuma, K.; Zakrzewski, V. G.; Voth, G. A.; Salvador, P.; Dannenberg, J. J.; Dapprich, S.; Daniels, A. D.; Farkas, Ö.; Foresman, J. B.; Ortiz, J. V.; Cioslowski, J.; Fox, D. J. Gaussian, Inc., Wallingford CT, 2010.
